# Supplementary material for: Effects of the Combined Treatment with a G-Quadruplex-Stabilizing Ligand and Photon Beams on Glioblastoma Stem-like Cells: A Magnetic Resonance Study
Source: Int J Mol Sci. 2021 Nov 24;22(23):12709. doi: 10.3390/ijms222312709 (PMC8657890; doi:10.3390/ijms222312709)

## Supplementary Figure 5.

A: 1D  $^1\text{H}$  MR spectra of line #1 and line #83 control cells at day 4 after seeding. In the lower panels, a Lorentzian-Gaussian function was applied for resolution enhancement with LB=-10 and GB=15. Assignments were performed according to Supplementary References [1,2].

B: Exemplificative 2D COSY spectra of a line #83 control sample at day 4 after seeding. The ten cross peaks used for the analysis are labelled. Assignments (see Table in the Figure S5 B) were performed according to Supplementary References [1,2]. The lysine (Lys) cross-peak at 1.70–3.00 ppm was used as intensity reference. Mobile lipid correlation A, B and F are shown in the inset.

## Supplementary References

- 1 Guidoni L, Ricci-Vitiani L, Rosi A, Palma A, Grande S, Luciani AM, Pelacchi F, Di Martino S, Colosimo C, Biffoni M, De Maria R, Pallini R, Viti.  $^1\text{H}$  NMR detects different metabolic profiles in glioblastoma stem-like cells. *NMR Biomed.* **2014**; 27: 129–145
- 2 Govindaraju V, Young K, Maudsley AA. Proton NMR chemical shifts and coupling constants for brain metabolites. *NMR Biomed.* **2000** May;13(3):129-53. doi: 10.1002/1099-1492(200005)13:3<129::aid-nbm619>3.0.co;2-v.

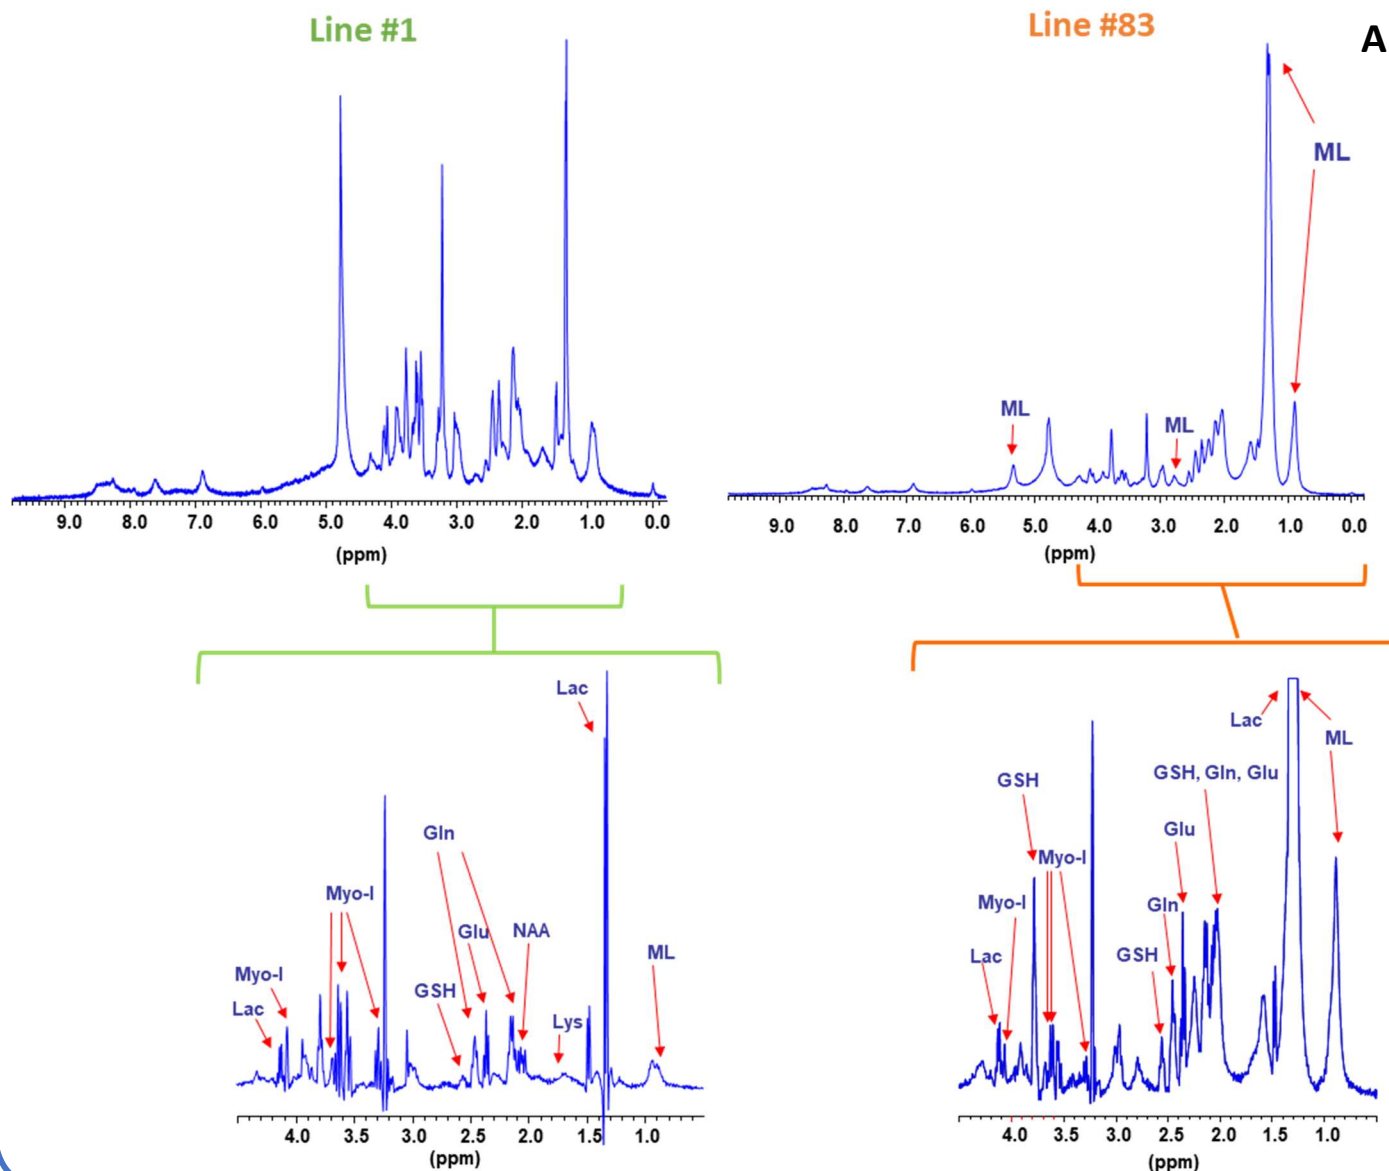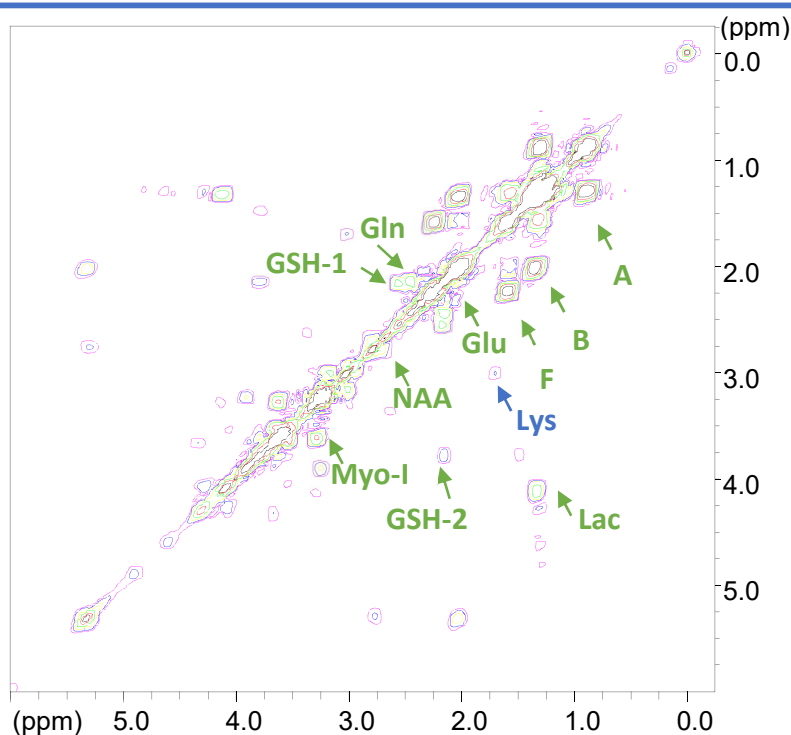

**B**

| Cross peak | Chemical shift (ppm) |
|------------|----------------------|
| A          | 1.28-0.89            |
| B          | 2.02-1.28            |
| F          | 2.35-1.65            |
| Lac        | 4.11-1.33            |
| Glu        | 2.35-2.10            |
| Gln        | 2.44-2.13            |
| GSH-1      | 2.56-2.15            |
| GSH-2      | 3.77-2.15            |
| NAA        | 2.67-2.48            |
| Myo-I      | 3.61-3.27            |
| Lys        | 3.00-1.70            |

Mobile Lipid chain

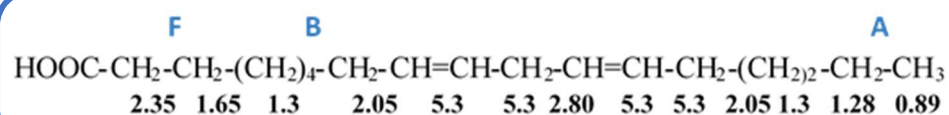

Supplement: Supplementary file 1 [file ijms-22-12709-s001.zip › Supplementary Figure S5.pdf]
